# Supplementary material for: Molecular mechanism of substrate recognition and specificity of tRNAHis guanylyltransferase during nucleotide addition in the 3′–5′ direction
Source: PubMed Central journal article supplement — RNA. 2018 Nov;24(11):1583–93. doi: 10.1261/rna.067330.118 (PMC6191723; doi:10.1261/rna.067330.118), 2018-11
Supplement: supp_067330.118_Supplemental_Information.pdf [file supp_067330.118_Supplemental_Information.pdf]

## Supporting Information

### **Molecular mechanism of substrate recognition and specificity of tRNA<sup>His</sup> guanylyltransferase during nucleotide addition in the 3'-5' direction**

Akiyoshi Nakamura<sup>1</sup>, Daole Wang<sup>2</sup>, and Yasuo Komatsu<sup>1, 2\*</sup>

<sup>1</sup> Bioproduction Research Institute, National Institute of Advanced Industrial Science and Technology (AIST), Sapporo 062-8517, Japan

<sup>2</sup> Graduate School of Life Science, Hokkaido University, Sapporo 060-0810, Japan

\* To whom correspondence should be addressed. Tel: +81-11-857-8437; Fax: +81-11-857-8954; Email: [komatsu-yasuo@aist.go.jp](mailto:komatsu-yasuo@aist.go.jp)

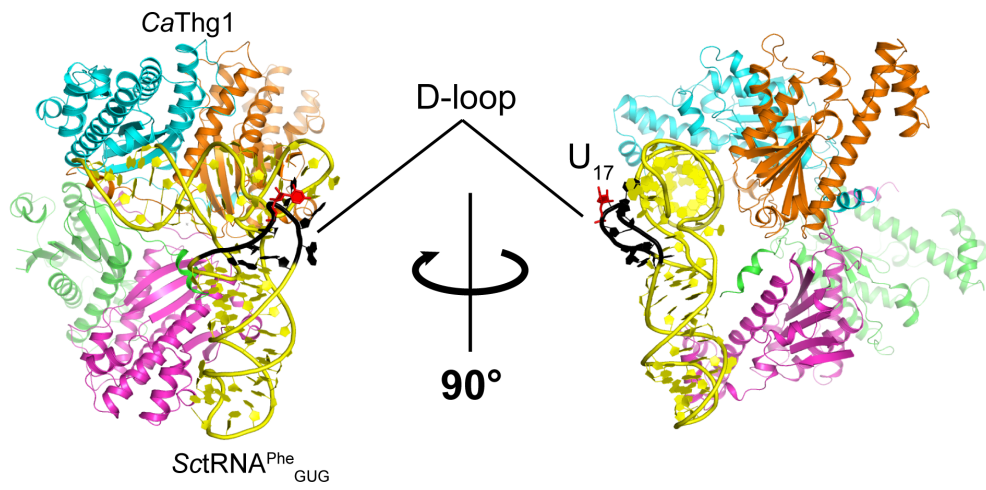

**Figure S1:** Structure of the *Candida albicans* Thg1 (CaThg1) and *S. cerevisiae* tRNA<sup>Phe</sup><sub>GUG</sub> (SctRNA<sup>Phe</sup><sub>GUG</sub>) complex (PDBID: 3WC2). The tetrameric structure of CaThg1 is shown as ribbon models (cyan, orange, green, and magenta). SctRNA<sup>Phe</sup><sub>GUG</sub> is shown as yellow ribbon, and its D-loop is indicated in black. The U<sub>17</sub> (red stick model) is flipped out from the tertiary core region of the tRNA.

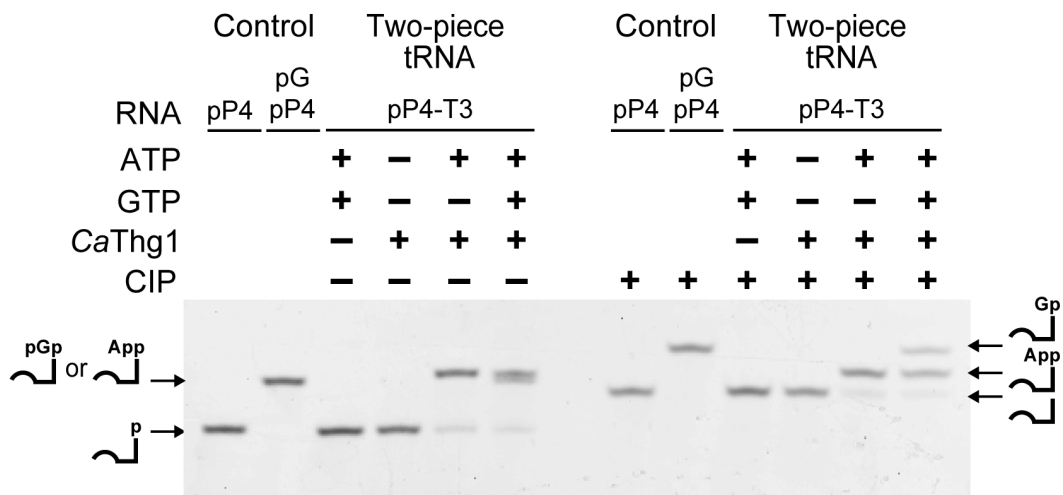

**Figure S2:** Separation of adenylylation and G<sub>-1</sub> addition reaction products with/without phosphatase (Calf Intestinal Alkaline Phosphatase; CIP) treatment by a denaturing PAGE. Two-piece tRNA composed of primer (pP4) and template (T3) fragments was incubated with 10  $\mu$ M *CaThg1* and with/without ATP and GTP for 30 min. Reaction mixture was incubated with CIP, and then loaded on a 20% Urea-PAGE gel. Chemical synthetic pP4 and pP4 with added G<sub>-1</sub> (pGpP4) were used as control samples.

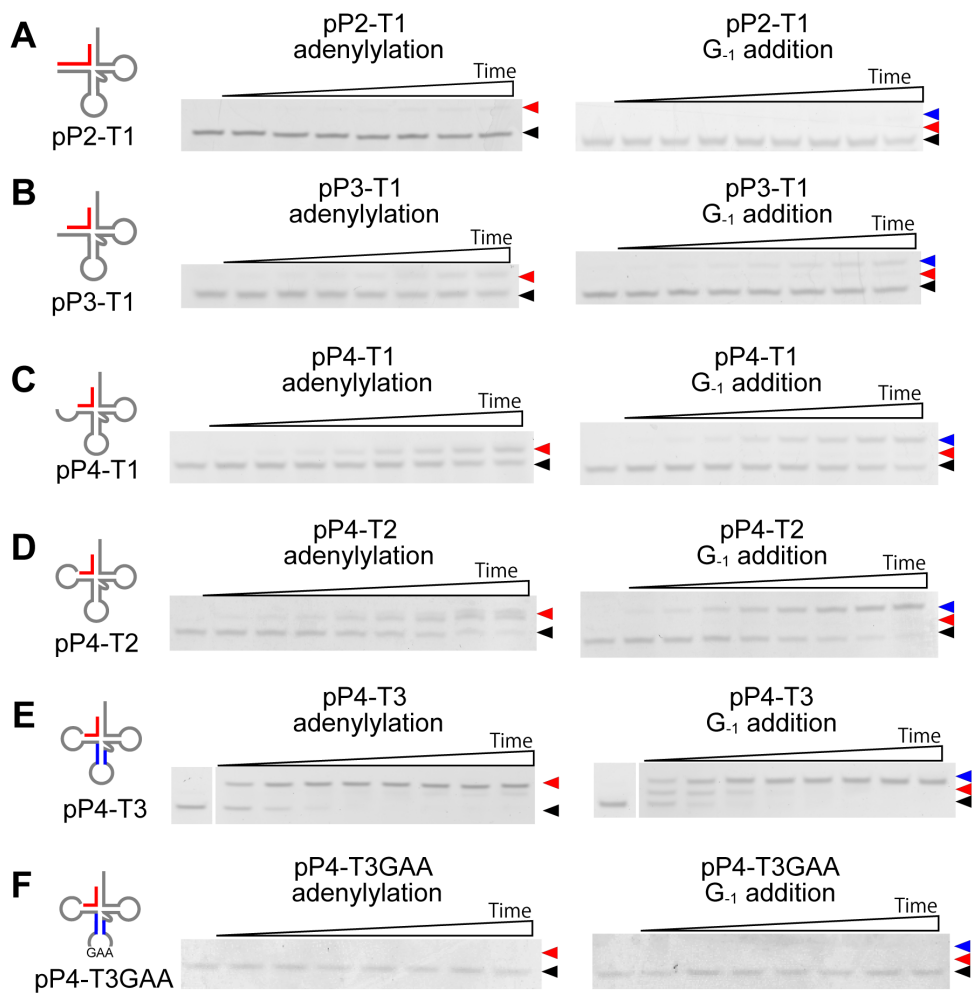

**Figure S3:** A primer/template assay of adenylylation and nucleotide addition reaction with two-piece tRNAs: pP2-T1 (A), pP3-T1 (B), pP4-T1 (C), pP4-T2 (D), pP4-T3 (E), pP4-T3GAA (F). Black, red, and blue triangles indicate bands of substrate, adenylylated product, and G<sub>-1</sub> added product, respectively.

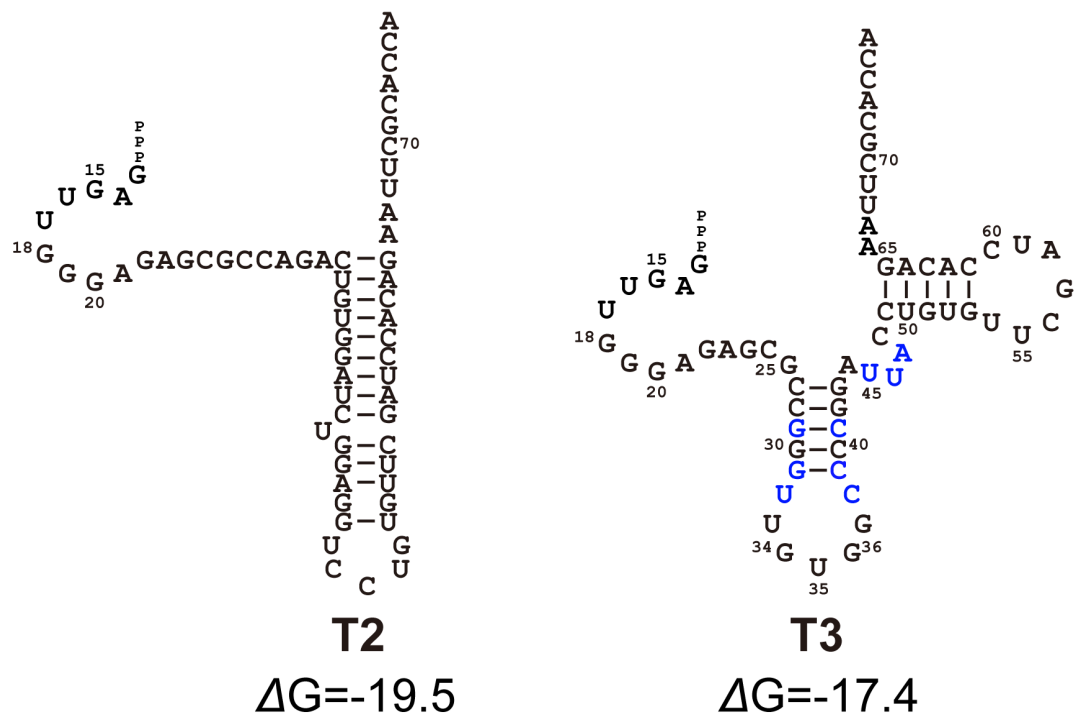

**Figure S4:** Secondary structure prediction of template RNAs by *Mfold* (1). The altered bases of T3 are indicated in blue.

1. Zuker, M. (2003) Mfold web server for nucleic acid folding and hybridization prediction. *Nucleic Acids Res.*, **31**, 3406-3415.

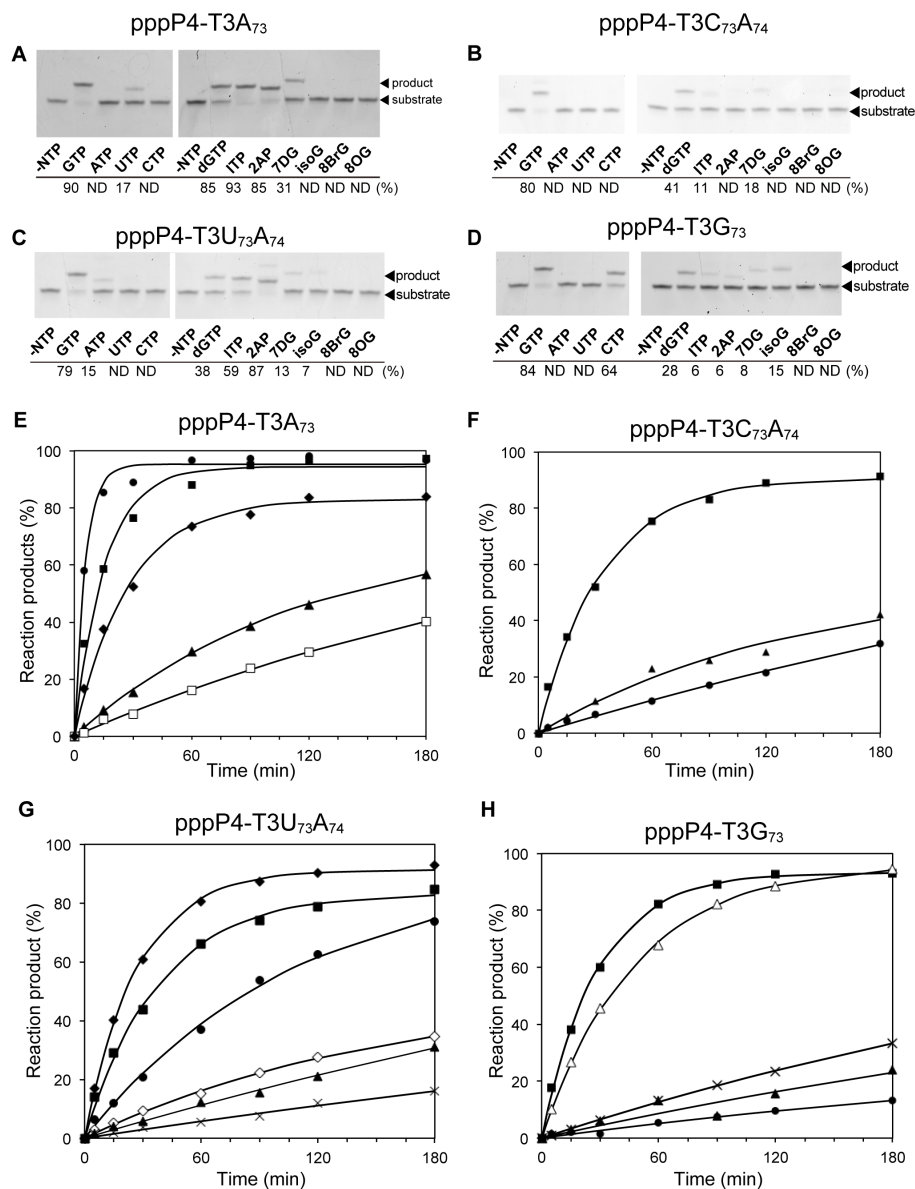

**Figure S5:** Nucleotide addition reactions for natural NTPs and various GTP analogs into two-piece tRNA variants.

(A-D) The percentage of nucleotide addition products for four natural NTPs and various GTP analogs after 60 min incubation with pppP4-T3 variants, analyzed by Urea-PAGE.

(E-H) Time course experiments of nucleotide addition reactions for various GTP analogs onto pppP4-T3A<sub>73</sub> (E), -T3C<sub>73</sub>A<sub>74</sub> (F), -T3U<sub>73</sub>A<sub>74</sub> (G), and -T3G<sub>73</sub> (H). Lines represent each time course fitted to a single-exponential equation (eq. 1) to yield  $k_{obs}$ . The marks indicate as follows; GTP (■), ITP (●), 2AP (◆), 7DG (▲), UTP (□), ATP (◇), CTP (△), isoG (×).

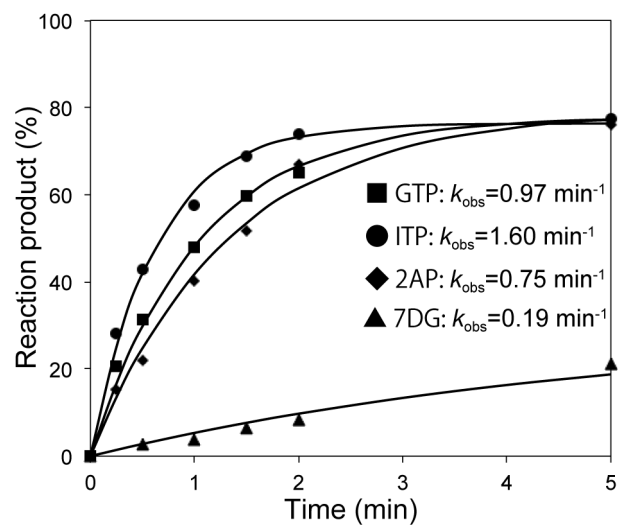

**Figure S6:** Time course experiments of nucleotide addition reaction for various GTP analogs onto the full-length *SctRNA*<sup>Phe</sup><sub>GUG</sub>. Lines represent each time course fitted to a single-exponential equation (eq. 1) to yield  $k_{\text{obs}}$ . The marks indicate as follows; GTP (■), ITP (●), 2AP (◆), 7DG (▲).

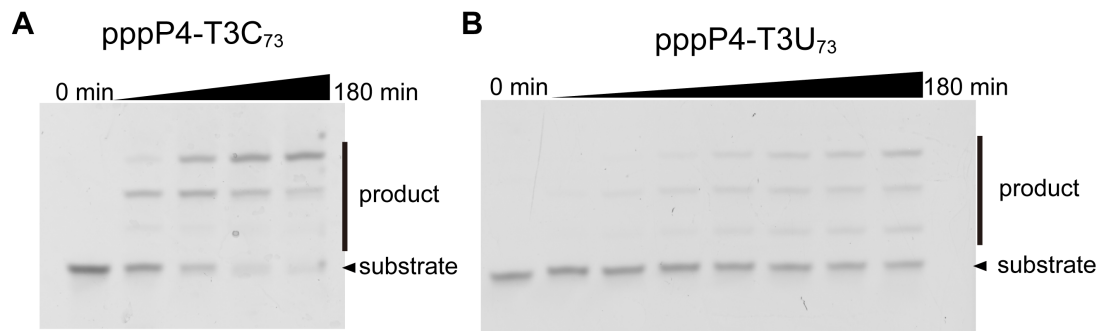

**Figure S7:** The multiple products formation of GTP addition onto pppP4-T3C<sub>73</sub> (A), -T3U<sub>73</sub> (B).
